# Supplementary material
Source: PubMed Central journal article supplement (PMC5278764)

**Global Health Scale-EORTC**

**A.**

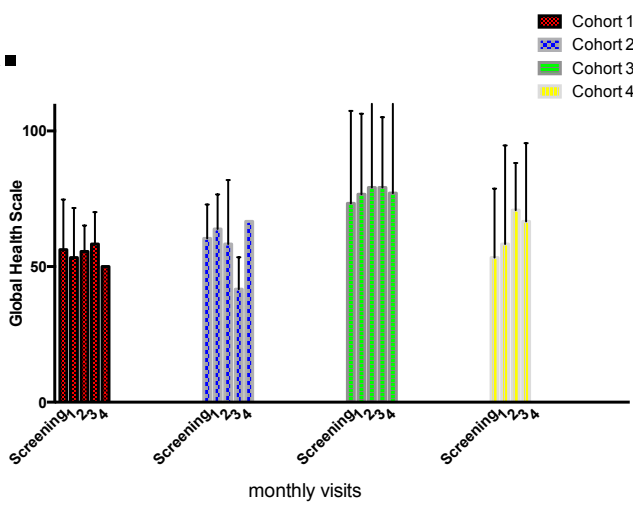

**Physical Function-EORTC**

**B.**

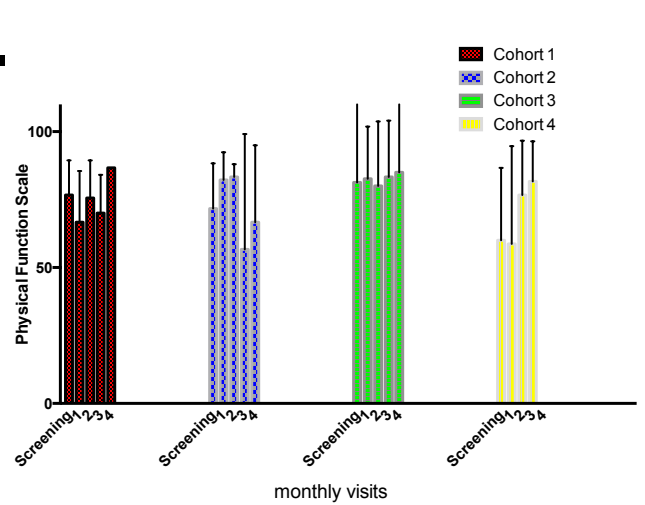

**Role Function-EORTC**

**C.**

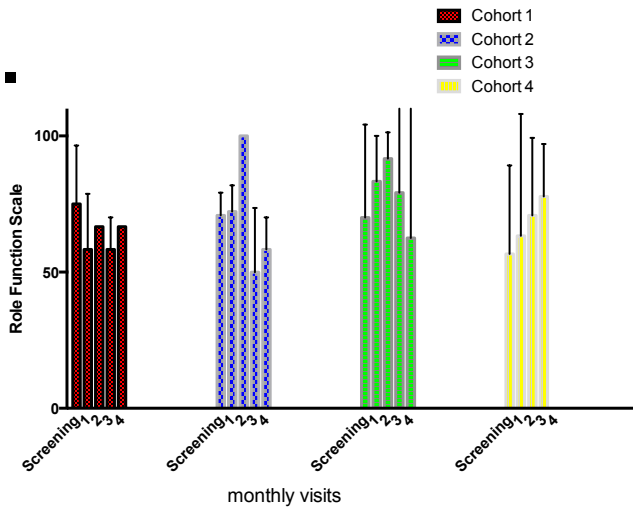

**Fatigue-EORTC**

**D.**

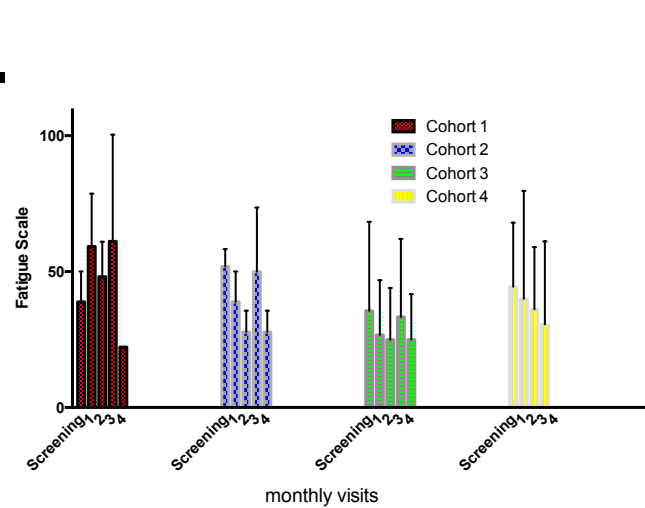

**Pain sxs-EORTC**

**E.**

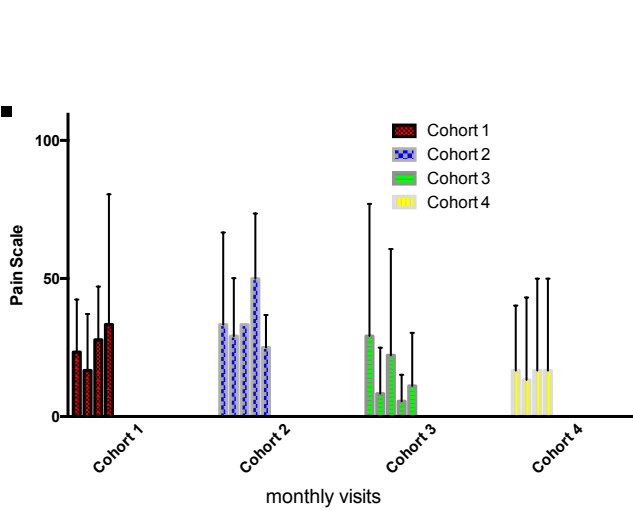

**GI sxs-EORTC**

**F.**

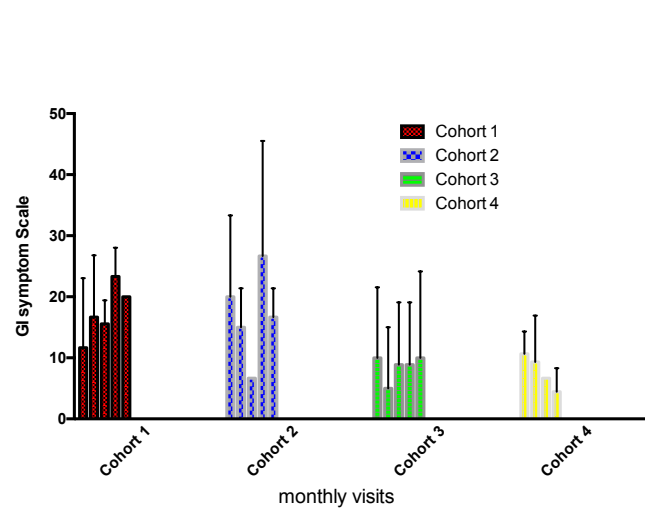

**FACT-LEU (TOI)**

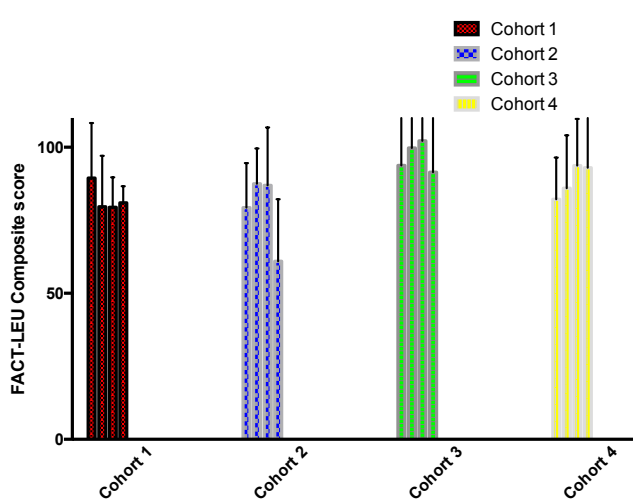

Supplement: NIHMS806690-supplement-Suppl_Fig_2.pdf [file NIHMS806690-supplement-Suppl_Fig_2.pdf]
