# Supplementary material
Source: PubMed Central journal article supplement (PMC5278764)

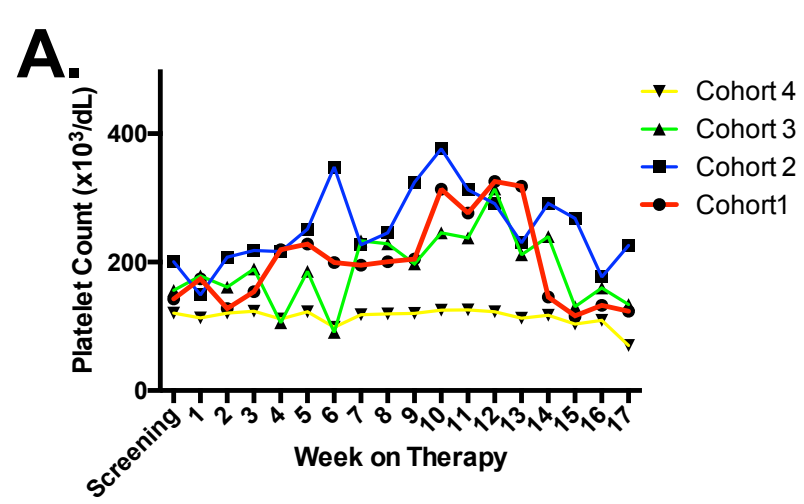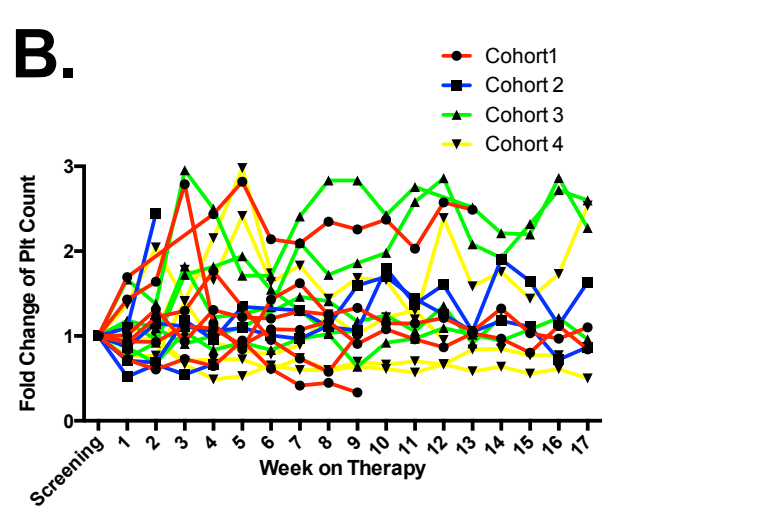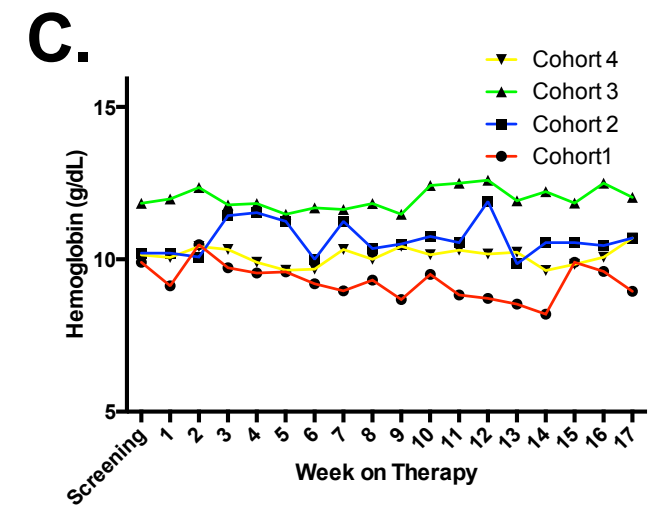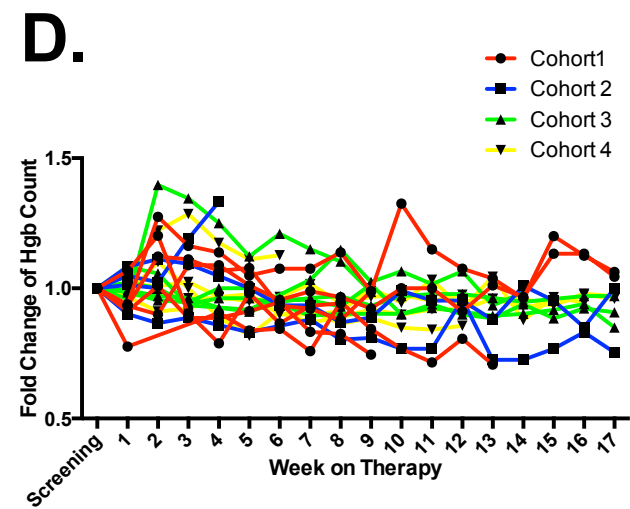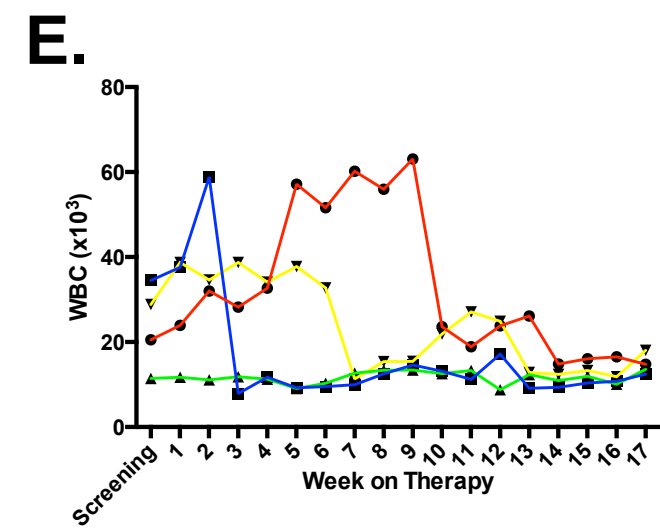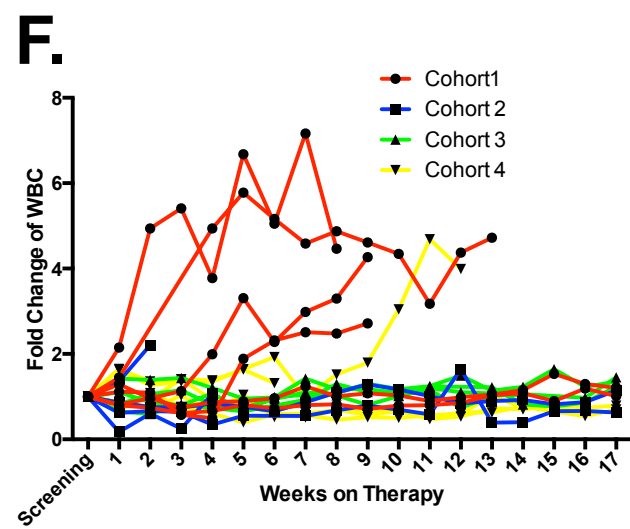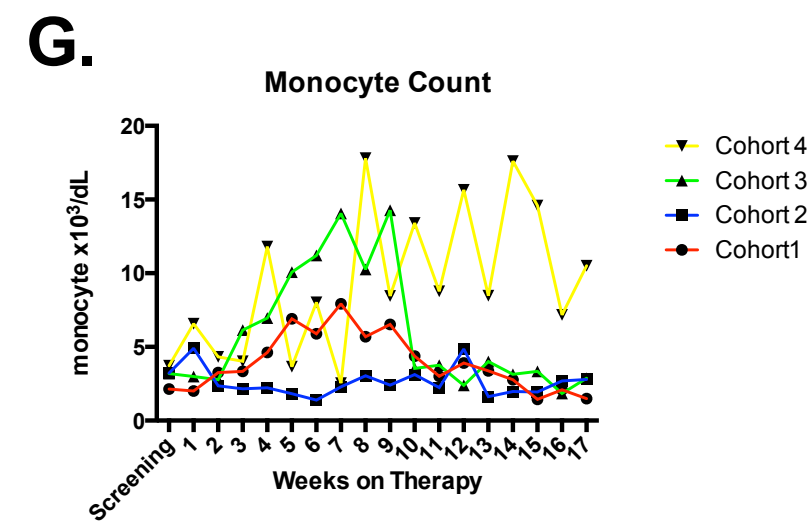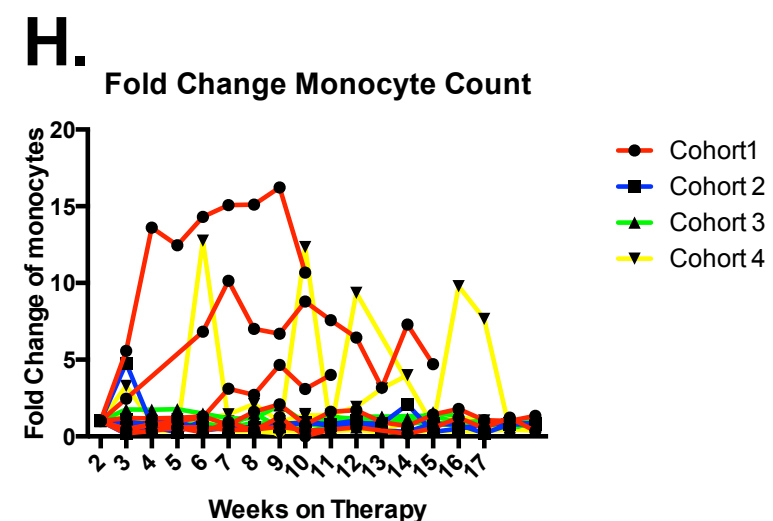

Supplement: NIHMS806690-supplement-Suppl_Fig_1.pdf [file NIHMS806690-supplement-Suppl_Fig_1.pdf]
